# Supplementary material for: Detection and differentiation of per- and polyfluoroalkyl substances (PFAS) in water using a fluorescent imprint-and-report sensor array
Source: Royal Society of Chemistry journal article supplement (doi:10.1039/d2sc05685b), 2022-12-29
Supplement: d2sc05685b1.xlsx [file d2sc05685b1.xlsx]

## Sheet: EGN individual
EGN 20 nM individual PFAS assay
	LCG	No Guest	GenX	PFOA	PFOS	PFHxA	PFPeA	PFHpA
EG	232264	197251	185143	191813	195923	198514	193322	202123
	232956	198336	189112	197788	199656	201741	193601	202564
	234003	198756	191724	200594	201085	204090	194491	204005
	234619	200392	192137	201188	202920	204461	195572	204247
GN	232264	194193	195563	189258	204649	211692	191692	212582
	232956	197102	198410	192733	206415	211782	196062	213208
	234003	198348	200026	195478	207651	212723	198122	213502
	234619	199737	200690	197424	208978	213115	199521	216036
EN	232264	195239	197287	206922	201628	204770	189476	195236
	232956	196130	197850	207280	203901	206545	189548	196818
	234003	196636	200006	207355	204359	210114	191162	197225
	234619	196761	200498	212553	205158	210168	192681	199400
ENG	232264	202357	202099	219079	225024	220524	226162	223490
	232956	205748	204899	222310	228669	221356	226260	223760
	234003	206547	206056	223284	228788	223642	227007	226915
	234619	208245	206339	223471	232429	228057	227606	227895
EGN 10 nM individual PFAS assay
	LCG	No Guest	PFOA	PFOS	GenX	PFHxA	PFPeA	PFHpA
EG	232264	148748	200983	173816	187057	170508	181978	175440
	232956	154938	201814	174986	189431	171951	181982	188835
	234003	157395	204697	175635	190867	182957	188413	194820
	234619	158710	205775	176482	191142	192644	188415	195996
GN	232264	181244	171712	190403	170999	187343	177668	179826
	232956	182593	172549	190761	177062	190281	183700	182597
	234003	189607	184979	200024	177483	190722	183705	186123
	234619	191483	186851	201377	179701	193369	190354	196060
EN	232264	184964	184589	158444	162439	203463	192790	196084
	232956	185803	188562	159381	170362	208097	207376	203204
	234003	194136	196942	160285	172453	209920	207389	204951
	234619	194140	200359	160331	176216	210029	211193	205661
ENG	232264	185615	215260	213479	202343	206093	211347	227482
	232956	197322	216388	214487	203845	206929	211352	229407
	234003	201883	216480	219037	211538	218482	218467	232661
	234619	208826	217368	225749	211541	218486	220478	232927
EGN 5 nM individual PFAS assay
	LCG	No Guest	PFOA	PFOS	GenX	PFHxA	PFPeA	PFHpA
EG	232264	192270	181623	196006	175038	191999	175324	179264
	232956	193031	185130	196577	175041	194575	176146	181913
	234003	195247	185902	197849	183334	195372	177228	183626
	234619	198187	186448	198910	188487	197833	182549	183631
GN	232264	185161	173120	172272	154050	181644	170318	160905
	232956	186666	173124	175321	159289	181647	176680	163376
	234003	188162	181909	176260	162481	187276	178871	164292
	234619	189482	182261	178164	170369	187298	181724	165000
EN	232264	175834	177267	185405	168435	194805	178291	167326
	232956	180467	179489	185669	175519	194809	184912	171844
	234003	183230	189836	189594	180173	201770	190266	171882
	234619	188354	190033	191433	181613	202988	190686	175573
ENG	232264	211594	185829	200990	195003	160859	212437	198705
	232956	216133	193879	201632	195156	197253	212791	198709
	234003	217138	194427	203237	200623	199186	216202	208357
	234619	217612	196307	204710	201598	203553	223039	209461

## Sheet: XGN individual
XGN 5 nM individual PFAS assay											XGN 5 nM individual PFAS assay trial 2
	LCG	No Guest	PFOA	PFOS	GenX	PFHxA	PFPeA	PFHpA				LCG	No Guest	PFOA	PFOS	GenX	PFHxA	PFPeA	PFHpA
XG	232264	132920	160455	177672	177264	181965	193915	191323			XG	232264	129392	159561	179787	173523	180437	197066	191510
	232956	133455	161893	183722	177267	185823	201884	194358				232956	134734	164606	185025	174015	185792	198543	191512
	234003	138512	164180	184381	178119	186918	202736	197517				234003	139496	164609	185404	177820	187154	199200	195037
	234619	141355	165978	186700	178655	187658	202862	197520				234619	139499	166325	186758	177823	187498	200823	195887
GN	232264	175902	181777	180885	161752	190727	178833	168950			GN	232264	173665	178567	178493	166764	184294	174108	161887
	232956	177332	181780	184087	167253	190729	185514	171544				232956	176110	183115	180798	166768	191352	180414	162646
	234003	178753	191004	185073	170605	196639	187814	172506				234003	176908	187391	185116	168333	191357	189730	171575
	234619	180007	191374	187072	178887	196662	190810	173250				234619	177598	193300	185995	171455	193797	191156	171578
XN	232264	174763	151897	149407	172765	138546	171314	165144			XN	232264	174789	153383	146863	171632	141162	171734	164129
	232956	183344	161507	149765	175917	138549	174042	169069				232956	181994	159564	148145	178410	143818	176474	171632
	234003	185356	161801	156012	177275	149843	176042	172885				234003	185186	162384	155661	179343	143953	177752	176153
	234619	188100	167625	157855	182257	152258	180379	176516				234619	185532	164352	161569	180212	147650	179702	176158
XNG	232264	150877	124795	139356	151051	140556	161528	143705			XNG	232264	149198	125999	142241	148538	138246	161666	144997
	232956	151212	130065	145374	152834	143455	163124	143709				232956	151916	126993	142244	150148	143096	162134	148179
	234003	152347	131628	146632	153553	143529	165316	152643				234003	154398	129750	143349	154192	146317	162953	148868
	234619	157591	131993	147146	155728	152330	167912	153053				234619	155138	136764	145423	155218	149248	168444	154006
XGN 1 nM individual PFAS assay											XGN 1 nM individual PFAS assay trial 2
	LCG	No Guest	PFOA	PFOS	GenX	PFHxA	PFPeA	PFHpA				LCG	No Guest	PFOA	PFOS	GenX	PFHxA	PFPeA	PFHpA
XG	232264	138129	130975	140708	131581	144507	128056	133119			XG	232264	133864	124811	140347	131924	141923	130052	138136
	232956	139606	131156	141044	134806	144771	131226	133932				232956	135628	125055	140350	133621	142451	130426	138494
	234003	140502	131580	141580	138049	145071	135547	134781				234003	139078	126116	142232	134026	144193	133659	139059
	234619	141182	132174	143610	138445	145799	136190	136647				234619	139081	132754	142493	137020	147437	137493	139491
GN	232264	201448	199033	198584	192970	226213	209648	206443			GN	232264	206433	203945	204606	196055	219326	219553	195415
	232956	204678	204934	202906	202109	229793	219013	206730				232956	208583	203950	204648	196059	222369	219556	210935
	234003	209635	207624	209254	206381	230448	226154	208316				234003	212534	204268	206758	205439	225431	219942	210930
	234619	216618	207916	213277	206932	231161	228015	208582				234619	214006	209892	212094	208924	227147	221947	214461
XN	232264	184667	203070	157133	198048	184007	204051	206432			XN	232264	184220	205043	160436	198140	181719	196287	205522
	232956	185060	206965	158947	200249	189412	204455	207231				232956	185527	205201	161232	198384	181723	203072	205527
	234003	189905	212329	163879	201732	189835	204967	209849				234003	191059	211503	161234	201272	188909	204043	210797
	234619	191213	216612	166348	203180	196827	206887	209969				234619	193382	216791	164344	204028	189930	209087	211035
XNG	232264	151818	169280	176294	161978	175072	153458	178720			XNG	232264	150834	166168	178958	163476	182262	155474	181493
	232956	155057	173170	183507	167389	178997	153929	180498				232956	151744	173220	183316	167022	182559	156240	181497
	234003	155771	174002	186801	168406	179448	159583	182880				234003	158802	173222	183320	168232	183169	158453	181964
	234619	155942	179402	188127	171214	179501	160543	184805				234619	159584	179370	188540	169686	184077	161645	187469
XGN 1 nM individual PFAS assay
	LCG	No Guest	PFOA	PFOS	GenX	PFHxA	PFPeA	PFHpA
XG	232264	138129	136373	137197	139875	133485	140310	137377
	232956	139606	138810	137912	140592	133904	142457	138540
	234003	140502	138849	139563	140942	133908	143768	139616
	234619	141182	139548	140691	141757	138897	144765	140035
GN	232264	201448	179974	185333	189297	185315	203079	209266
	232956	204678	181607	190128	191098	186917	208127	213321
	234003	209635	185807	195617	196329	187494	209389	216773
	234619	216618	190432	201351	197512	189624	211827	217363
XN	232264	184667	187171	173072	175538	178528	177991	190732
	232956	185060	188200	173842	179643	179738	185347	192235
	234003	189905	191044	175086	183285	180762	187737	195668
	234619	191213	193129	176472	188154	185747	188733	202059
XNG	232264	151818	152819	156588	154679	151934	153507	145313
	232956	155057	153256	156854	154954	152264	157812	152169
	234003	155771	163718	156875	154966	156839	161956	155582
	234619	155942	163988	161021	157077	158201	163061	156584
XGN 5 nM individual PFAS assay- untemplated DCLs
	LCG	No Guest	PFOA	PFOS	GenX	PFHxA	PFPeA	PFHpA
XG	246199	222360	214483	233717	207124	225114	214800	213318
	246933	232260	220912	236389	207127	225626	222832	216893
	248043	235734	234658	239298	214639	228701	224715	224329
	248696	239272	237074	241339	227189	228744	231075	224334
GN	246199	224532	219926	214145	225630	216877	216294	236730
	246933	233306	219930	224143	232250	216880	218517	236864
	248043	248289	220802	225760	242366	222178	218658	240756
	248696	250382	223476	227035	243077	223524	221668	241117
XN	246199	201726	200684	216129	213317	215369	234151	215780
	246933	205655	205278	217794	217100	215373	235006	221460
	248043	218246	214462	222769	218816	241325	239909	221524
	248696	219587	217441	224210	220951	243026	241190	231236
XNG	246199	217336	204231	208125	195474	206490	210206	215640
	246933	218351	219561	209725	210578	211355	211545	215643
	248043	219052	219973	215837	210783	216245	225830	218469
	248696	221147	236613	216269	212034	216378	226020	222926

## Sheet: simple mixture set
XGN 10 nM PFAS mixtures assay (binary, ternary, etc.)
	LCG	No Guest	Binary	Ternary	Quaternary	Quinary	Senary
XG	232264	137975	137355	137022	135531	140241	127826
	232956	140697	139208	137347	136673	140618	128976
	234003	140733	139638	137539	142111	140871	130873
	234619	143270	140867	138473	142513	140898	135685
GN	232264	173265	173864	181211	178375	193639	200599
	232956	178373	177205	186327	181767	198506	202020
	234003	180658	177927	187896	186703	200244	203303
	234619	184812	183271	191468	188764	200332	204515
XN	232264	181993	166997	175743	173020	173113	169874
	232956	186017	169755	178166	173042	179075	177171
	234003	188355	177792	182938	181558	179234	179111
	234619	188429	180547	184844	182651	182073	179673
XNG	232264	147541	147263	135550	145896	156464	149433
	232956	148279	149187	138031	148401	160569	150952
	234003	155701	149302	138499	150130	160986	151264
	234619	156614	155571	139935	150349	161431	151527
XGN 20 nM PFAS mixtures assay (binary, ternary, etc.)										XGN 20 nM PFAS mixtures assay (binary, ternary, etc.) trial 2
	LCG	No Guest	Binary	Ternary	Quaternary	Quinary	Senary				LCG	No Guest	Binary	Ternary	Quaternary	Quinary	Senary
XG	232264	137975	137525	141494	150034	140381	135662			XG	232264	137975	136603	141494	148213	140381	140303
	232956	140697	137745	145903	151031	142916	137999				232956	140697	136608	145903	148219	142916	140307
	234003	140733	138471	146075	152060	145281	140886				234003	140733	138468	146075	151233	145281	140995
	234619	143270	140051	146077	152186	147371	141883				234619	143270	138472	146077	151239	147371	143025
GN	232264	173265	214201	223342	209291	223104	236142			GN	232264	173265	214201	223342	209291	223104	236142
	232956	178373	214385	225460	212096	223959	236332				232956	178373	214385	225460	212096	223959	236332
	234003	180658	214493	225632	217006	224838	236826				234003	180658	214493	225632	217006	224838	236826
	234619	184812	218756	230260	217025	228860	242073				234619	184812	218756	230260	217025	228860	242073
XN	232264	181993	159927	169989	188392	170401	182080			XN	232264	181993	161710	172442	190454	175789	184352
	232956	186017	164138	172703	192331	170968	187036				232956	186017	166841	172446	190459	175793	186234
	234003	188355	172550	173780	194539	175283	188254				234003	188355	172038	175924	193677	178432	187670
	234619	188429	175567	175263	197779	175893	190485				234619	188429	175682	175929	193850	178438	188640
XNG	232264	147541	143717	159497	153663	150698	166871			XNG	232264	147541	141621	159497	150286	150698	166119
	232956	148279	143957	161452	155179	154013	168804				232956	148279	144873	161452	152572	154013	170139
	234003	155701	147004	162668	155437	157026	173348				234003	155701	146340	162668	156301	157026	175507
	234619	156614	147858	163181	157119	157401	175837				234619	156614	148815	163181	157118	157401	175749

## Sheet: NC mixture set
XGN 20-90 nM PFAS mixtures assay (NC mixtures)										XGN 20-90 nM PFAS mixtures assay (NC mixtures) trial 2
	LCG	No Guest	Mebane	Raeford	Ramseur	Sanford	Wallace				LCG	No Guest	Mebane	Raeford	Ramseur	Sanford	Wallace
XG	232264	136175	133306	147958	136137	134141	128565			XG	232264	135630	133547	147744	136019	134133	128522
	232956	139020	134281	148531	137732	144914	137116				232956	139410	134308	149212	136756	144902	136504
	234003	139946	134986	150616	142360	147045	138158				234003	140557	134445	150082	142426	147222	139000
	234619	144312	136274	150826	142763	151561	140611				234619	144460	136273	150883	143664	151124	140649
GN	232264	184805	188355	184283	180871	200909	183714			GN	232264	184805	198286	189927	184663	204168	188663
	232956	188034	191200	189927	184371	204168	185768				232956	188034	188355	191553	184675	209601	185768
	234003	189744	194204	190542	184663	204525	187965				234003	189744	198522	190542	188677	204525	187965
	234619	189961	198286	191553	184675	207635	188663				234619	189961	194204	184283	184371	200909	189453
XN	232264	177519	192842	178656	183001	165190	187537			XN	232264	177241	192851	178115	183223	165310	187154
	232956	179913	195008	181713	185550	170731	196646				232956	179742	194648	181170	184271	170365	195027
	234003	181399	195993	184908	185691	173250	198191				234003	180025	195018	185627	186448	173070	198615
	234619	183381	197009	186506	188941	173376	200441				234619	183740	197813	186568	188452	173580	201410
XNG	232264	134101	149579	143700	138514	147280	149772			XNG	232264	134731	149413	143345	138073	146904	150894
	232956	140052	149768	146289	140828	147597	158420				232956	140895	150585	146858	140198	148492	157118
	234003	143794	150637	148817	141818	157460	161225				234003	143029	150714	148212	142047	157289	162192
	234619	148147	152971	149185	148431	158174	162497				234619	147861	152122	149725	148777	158923	162982
XGN 10-45 nM PFAS mixtures assay (NC mixtures)
	LCG	No Guest	Mebane	Raeford	Ramseur	Sanford	Wallace
XG	232264	133559	132308	129667	139682	139630	133820
	232956	133950	132902	131493	140256	140259	136972
	234003	134246	134808	131736	141406	141645	138987
	234619	135498	136039	132933	145066	142749	142988
GN	232264	152534	180111	160144	177000	199411	185308
	232956	155107	181942	161091	178999	199607	189792
	234003	159794	186235	161660	179218	201235	190191
	234619	164041	190132	161929	182635	202074	198255
XN	232264	159728	153095	163299	167497	188037	166579
	232956	165077	156598	166354	170312	191884	168964
	234003	165802	157998	167921	171650	196363	169085
	234619	168241	162722	168719	175881	197317	177204
XNG	232264	137402	143905	152510	135681	143904	145728
	232956	141795	144520	154967	138776	147522	147064
	234003	142271	146207	156342	141885	147753	147524
	234619	146407	147829	157226	143152	155667	150185

## Sheet: tap water
XGN 40-180 nM PFAS mixtures assay (NC mixtures in tap water)
	LCG	milliQ	UNC water (not spiked)	Mebane	Raeford	Ramseur	Sanford	Wallace
XG	232100	165680	162057	156120	155936	156697	145807	158663
	232839	166061	163433	156209	155945	157231	145851	159088
	234120	166658	163674	158391	159960	159719	146009	159794
	235280	167209	164571	159265	160854	161280	147741	162296
GN	232100	178614	176360	184688	189422	182938	205440	197442
	232839	196590	180642	191872	190761	188622	213174	197618
	234120	196890	184707	193563	191717	191409	215516	199263
	235280	198114	189364	200554	192698	192948	215683	210975
XN	232100	209790	215674	215494	212656	209760	224815	224287
	232839	210440	216197	219664	215158	215240	227319	234718
	234120	211956	217523	222299	220371	225057	227935	238064
	235280	219434	218106	222588	223423	226490	236426	239069
XNG	232100	158477	161508	162663	166815	165531	164634	169371
	232839	163130	165195	162988	171332	165892	166407	170918
	234120	163625	165965	170933	174704	169540	170579	174874
	235280	164656	168237	172404	177949	171205	172228	175864
XGN 40-180 nM PFAS mixtures assay (NC mixtures in tap water) trial 2
	LCG	milliQ	UNC water (not spiked)	Mebane	Raeford	Ramseur	Sanford	Wallace
XG	232100	159879	170059	160745	159352	165602	151121	157179
	232839	160330	170662	162474	163905	165929	152529	157447
	234120	162011	171130	162945	164342	165985	154655	161017
	235280	163908	171501	162987	164809	171404	156232	166329
GN	232100	172007	181781	183472	185275	204465	180609	191336
	232839	175417	185883	184071	185761	210932	181112	192545
	234120	181667	187927	188650	187111	214075	186146	194341
	235280	184277	192790	190951	188090	216595	191313	196774
XN	232100	211967	208831	210691	206763	227159	218385	214952
	232839	212250	210826	215762	208613	233179	218618	226799
	234120	215201	217485	220683	208691	234724	226812	227621
	235280	220373	221828	223758	211704	238056	227889	227989
XNG	232100	156201	161393	166856	158522	161844	160151	159902
	232839	159968	161948	167867	159836	163148	163390	162345
	234120	163600	162605	168646	160646	166010	168569	165191
	235280	163790	163170	175247	164592	170683	172080	166557
XGN 40-180 nM PFAS mixtures assay (NC mixtures in tap water) trial 3
	LCG	milliQ	UNC water (not spiked)	Mebane	Raeford	Ramseur	Sanford	Wallace
XG	232100	165680	161261	156364	155638	158779	145094	159561
	232839	166061	161426	156827	157981	159138	147488	159565
	234120	166658	163654	157584	158548	159814	147679	161825
	235280	167209	167030	157796	159325	160978	148586	161987
GN	232100	178614	180597	191357	188267	184536	207683	198282
	232839	196590	181687	192711	190492	189783	210870	200042
	234120	196890	182225	193321	190698	190423	214974	203896
	235280	198114	186287	194229	191799	192443	215358	204766
XN	232100	209790	215598	217383	216168	216000	226199	228239
	232839	210440	212656	219697	217698	216685	230988	235007
	234120	211956	216011	220685	218986	218821	233932	235028
	235280	219434	222182	221621	220833	219085	234399	240880
XNG	232100	158477	160286	166613	170507	167555	166447	168986
	232839	163130	163169	167047	167245	168592	166906	172864
	234120	163625	166556	169179	173243	170438	168288	174994
	235280	164656	168945	169486	174108	166792	170790	175032
